# Supplementary material for: Household transmission of respiratory viruses – assessment of viral, individual and household characteristics in a population study of healthy Australian adults
Source: PubMed Central journal article supplement (PMC3538067; doi:10.1186/1471-2334-12-345), 2012-12-11
Supplement: 1471-2334-12-345-S1.pdf [file 1471-2334-12-345-S1.pdf]

Participant ID:

Date of Birth: \_\_\_\_ / \_\_\_\_ / \_\_\_\_

**Respiratory Viruses Causing Influenza-Like Illnesses in Healthy Australian Adults  
Aged 18 to 64 years: molecular and clinical characteristics:**

**Illness Visit Questionnaire**

Dear Participant,

Thank you for agreeing to take part in our study to find out the range of viruses that cause respiratory infections. We are interested in knowing about the length and severity of illness experienced by people with different virus infections and how many people in your household were ill. **On the first day during recovery that you have only mild or no symptoms**, we would appreciate 5 minutes of your time to complete the following brief questionnaire. Please return the completed sheet in the reply paid envelope provided. If any questions are unclear and you need help to complete the form, please feel free to phone \_\_\_\_\_ on \_\_\_\_\_

**Date of illness onset** \_\_\_\_ / \_\_\_\_ / \_\_\_\_ **Date of illness visit** \_\_\_\_ / \_\_\_\_ / \_\_\_\_

**Please circle each symptom you experienced during this illness**

|                                       |                     |                           |                   |
|---------------------------------------|---------------------|---------------------------|-------------------|
| Fever ( $\geq 37.8^{\circ}\text{C}$ ) | Feeling feverish    | Chills                    | Muscle/body aches |
| Headache                              | Irritability        | Decreased activity        | Vomiting          |
| Runny Nose                            | Blocked nose        | Sore Throat               | Cough             |
| Wheezing                              | Shortness of breath | Moist cough, rattly chest | Pneumonia         |

**Did you receive antivirals from study staff at your illness visit?** Yes / No

**Did you have to take time off from your usual activities (work, study, etc) during this illness?** Yes / No

If yes, how many days? \_\_\_\_\_ days

**Did you consult a health care provider during this illness? Yes / No**

If yes, what kind (eg GP, district nurse, naturopath)? \_\_\_\_\_

**If so, did your health care provider diagnose and/or treat you for any of the following conditions (please circle all that apply)?**

Bronchitis / Pneumonia / Chest Infection / Ear Infection / Sinusitis

**Were you admitted to a hospital ward for at least one night? Yes / No**

If yes, Admission date \_\_\_\_ / \_\_\_\_ / \_\_\_\_ Discharge date \_\_\_\_ / \_\_\_\_ / \_\_\_\_

**What day during recovery did you first experience only mild or no symptoms?**  
\_\_\_\_ / \_\_\_\_ / \_\_\_\_

**Please complete the table below:**

1. List details of the gender and age of all the people who live in your household, including you. If you need more rows, just write below the table.
2. Did anyone else in your household have a similar illness in the fortnight before you, or between the start of your illness and today? Please answer Yes or No for each person.
3. For each person who experienced a similar illness, please write the date on which their symptoms started in the far right column.

| <b>Person Number</b> | <b>Male or Female</b> | <b>Age (Years)</b> | <b>Was this person unwell? (Yes or No)</b> | <b>Date of illness onset (eg 01 June)</b> |
|----------------------|-----------------------|--------------------|--------------------------------------------|-------------------------------------------|
| <b>1 (You)</b>       |                       |                    |                                            |                                           |
| <b>2</b>             |                       |                    |                                            |                                           |
| <b>3</b>             |                       |                    |                                            |                                           |
| <b>4</b>             |                       |                    |                                            |                                           |
| <b>5</b>             |                       |                    |                                            |                                           |
| <b>6</b>             |                       |                    |                                            |                                           |
| <b>7</b>             |                       |                    |                                            |                                           |

**Date you completed this questionnaire** \_\_\_\_\_ / \_\_\_\_\_ / \_\_\_\_\_

Thank you once again for your time and help with this study!

Yours sincerely

The Viral ILI Sub-study Investigators
